# Supplementary material for: Inferring Pathway Activity toward Precise Disease Classification
Source: PLOS journal article supplement (doi:10.1371/journal.pcbi.1000217), 2008-11-06

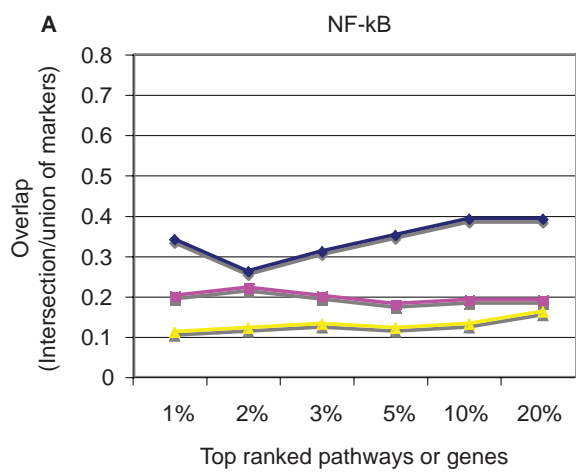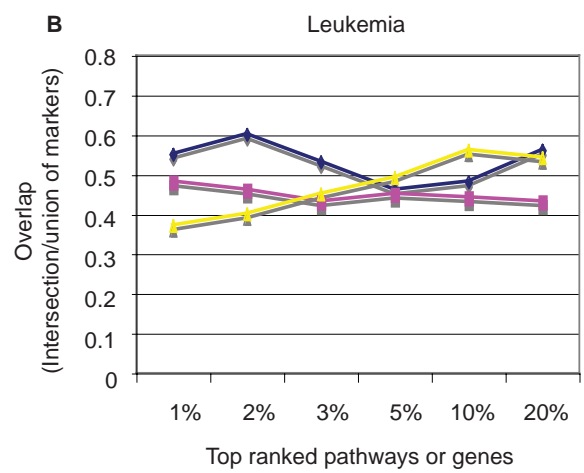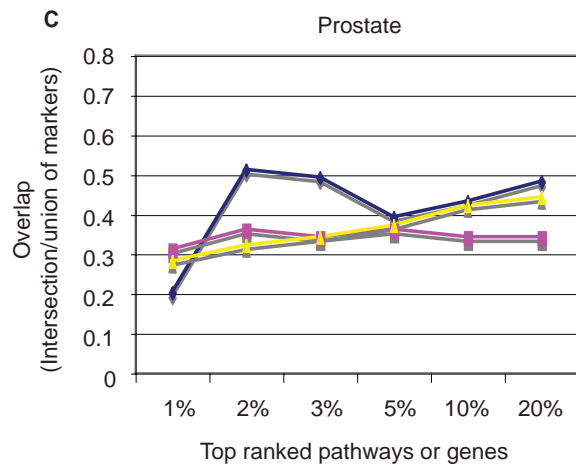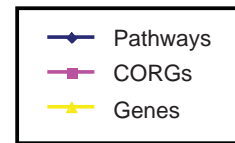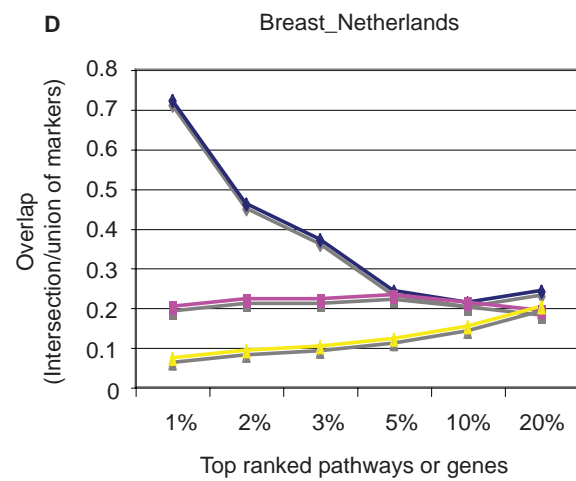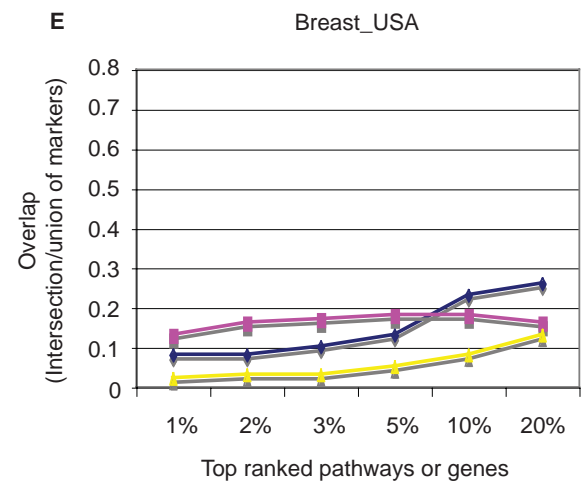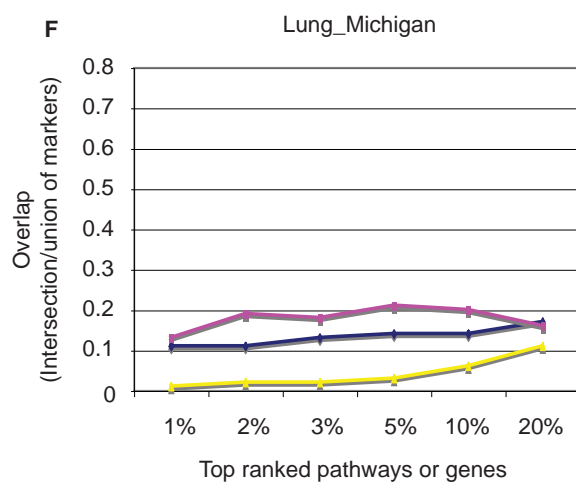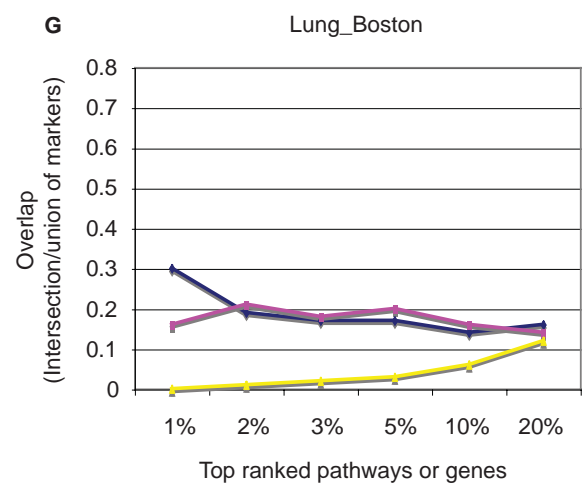

Supplement: S3 (10.1371/journal.pcbi.1000217.s003) [file journal.pcbi.1000217.s003]
